# Supplementary material for: Digichem: computational chemistry for everyone
Source: Royal Society of Chemistry journal article supplement (doi:10.1039/d4dd00147h), 2024-01-01
Supplement: d4dd00147h2.pdf [file d4dd00147h2.pdf]

# Digichem: Computational Chemistry For Everyone

## Supporting Information

*Oliver S. Lee<sup>a,b</sup>, Malte C. Gather<sup>b,c\*</sup> and Eli Zysman-Colman<sup>a\*</sup>*

<sup>a</sup>Organic Semiconductor Centre, EaStCHEM School of Chemistry, University of St Andrews, St Andrews, UK, KY16 9ST

<sup>b</sup>Organic Semiconductor Centre, SUPA School of Physics and Astronomy, University of St Andrews, St Andrews, UK, KY16 9SS.

<sup>c</sup>Humboldt Centre for Nano- and Biophotonics, Department of Chemistry, University of Cologne, Greinstr. 4-6, 50939 Köln, Germany.

## Contents

### **Benchmarking3**

3

5

5

5

6

### **8**

8

8

9

### **10**

### **References19**

# Benchmarking

## Method

Optimisation calculations were performed on five different benzene oligomers (**Figure S1**), starting from benzene and including *para*-terphenyl (**3Phenyl**), *para*-pentaphenyl (**5Phenyl**), *para*-heptaphenyl (**7Phenyl**), and *para*-nonaphenyl (**9Phenyl**). The geometry of the larger oligomers take (on average) more optimisation cycles to converge to a minimum, and thus result in a larger log file (more program output). This permits the impact of the log file size to be evaluated in the parsing benchmarks.

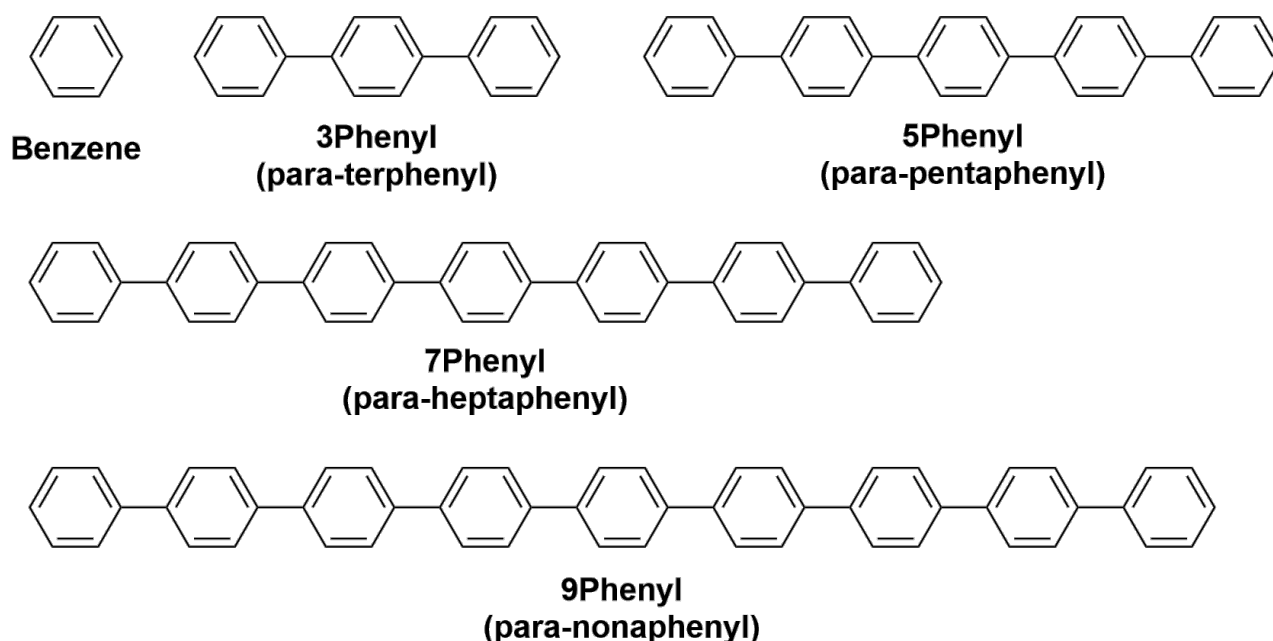

**Figure S1.** Names and structures of the five molecules benchmarked.

Identical calculations were carried out on all five molecules using Gaussian 16, revision C.01,<sup>1</sup> using the PBE0 functional<sup>2-4</sup> with the D3<sup>5</sup> version of Grimme's dispersion (including Beck-Johnson damping<sup>6</sup>) and the 6-31G\*\* basis set.<sup>7-9</sup> The input files used for each calculation are available in the supporting information. All the calculations were performed on the same compute node of the University of St Andrews high-performance computing (HPC) cluster (Kennedy) and were submitted using the same version of Digichem (7.0.0-pre.3).<sup>10</sup> All 3D images were rendered using VMD 1.9.3<sup>11</sup> and the included version of Tachyon.<sup>12</sup> The number of threads used by Tachyon to render in parallel was left as the default, which uses the same number of threads as available CPU cores (32 in these tests). For each calculation, Digichem automatically recorded the time taken to render each 3D image, as well as the total time spent rendering the entire PDF report (including all images together). The time taken to parse the log file and to generate just the PDF file (excluding image generation) were recorded separately using the main login node of the cluster.

We compared the rendering times for three different types of images for each molecule, to evaluate how the complexity of each render (*i.e.*, the number of surfaces in the scene) impacts the rendering time. The first render (structure) contains only the molecular geometry and does not include any isosurfaces. The second render (HOMO) additionally contains a single isosurface (the HOMO of each molecule), while the third render (HOMO/LUMO) contains two isosurfaces (the HOMO and LUMO of each molecule). The images were rendered in this order, which may be important when evaluating the impact of file caching. Each ‘image’ was rendered four times from four different angles, which is the same behaviour encountered in the PDF reports. The reported render time is the total time to render each of the four angles for each image. The four angles were the same for each molecule and each image type. The images rendered for Benzene are shown in **Figure S2**, and the complete set of rendered images is available in the supporting information.

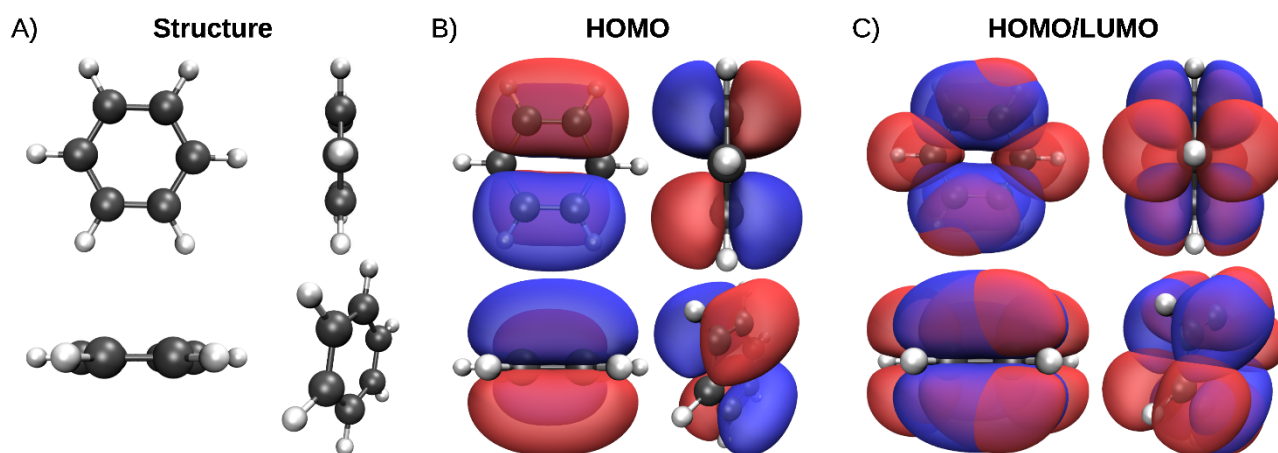

**Figure S2.** The three image types rendered for Benzene. a) the structure image (no isosurface). b) the HOMO image (1 isosurface). c) the HOMO/LUMO image (2 isosurfaces).

The Kennedy HPC system uses a network distributed file system (the General Parallel File System (GPFS)). This system permits each node in the cluster to seamlessly access the same file system but can be significantly slower than a traditional locally-mounted filesystem, especially when the system is under load (experiencing many simultaneous reads and/or writes). Additionally, GPFS utilises a form of local file caching that is beyond the control of the end-user. This file caching can result in inconsistent program timings because the first access to a file (which cannot make use of the cache as it does not exist yet) is often much slower than subsequent accesses to the same file. To combat this, each of the manually recorded operations (log file parsing and PDF report writing) was repeated three times. The first run (which typically does not make use of caching) produced inconsistent timings and was discarded. The second and third runs were averaged to give the reported times. All timings (included the discarded values) are reported for consistency in **Table S1**, **Table S2**, and **Table S3**.

## Results

### Log file parsing

As expected, the size of the log file produced by each calculation increases with the size of the molecule (**Figure S3a**), as the larger oligomers both require more optimisation steps and produce more output per optimisation step. The time taken by Digichem to parse each log file increased proportionally to the size of the log file (**Figure S3b**), likely indicating that the parsing process is IO-limited (*i.e.*, the bottleneck is reading from the log file rather than processing the resulting data), although this wasn't investigated directly. Even for the largest log file (**9Phenyl**, 29 MB, 420,000 lines), the parsing was complete in under 12 s.

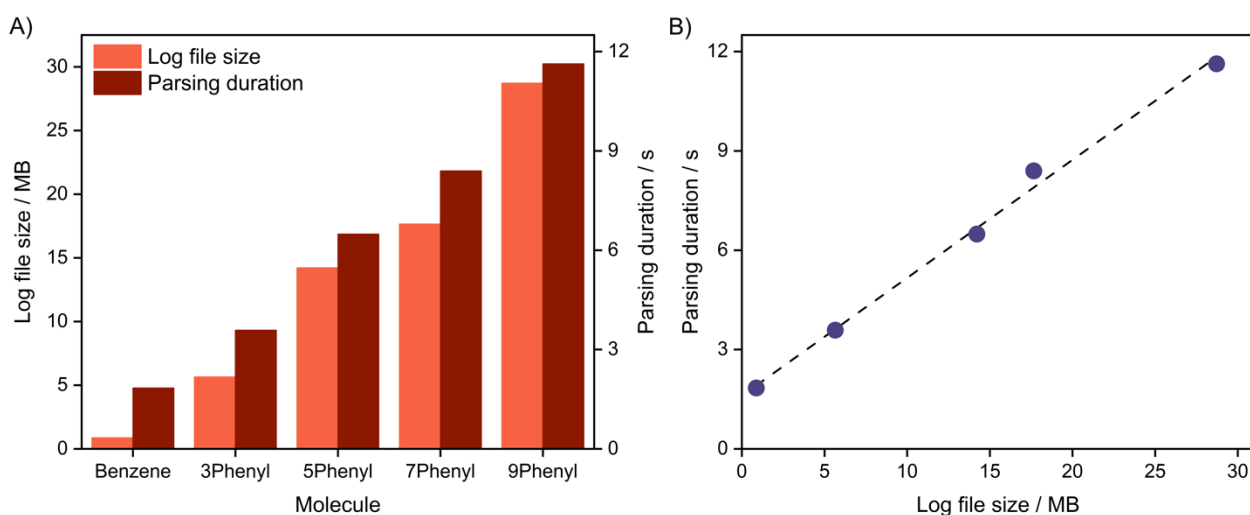

**Figure S3.** Log file size and parsing duration for each of the five molecules. The file size is reported in megabytes, where 1 MB = 1024<sup>2</sup> bytes.

### Image rendering

There is little trend between the rendering time of each image and the size of the molecule and/or the image complexity (**Figure S4a**). In two cases (**Benzene** and **7Phenyl**), the first image rendered (structure) took significantly longer than either the HOMO or HOMO/LUMO images, despite being the least complex (having no isosurfaces), again suggesting that the speed of the filesystem may be limiting the overall rendering speed. Except for **Benzene**, the render duration for the HOMO/LUMO image increased slightly with the larger oligomers, but no such trend can be observed for the other two types of images. Except for the outliers of the structure images for **Benzene** and **7Phenyl**, each image took between 10 – 30 s to render. Even for the slowest image, rendering was complete in under a minute (**Benzene**, structure).

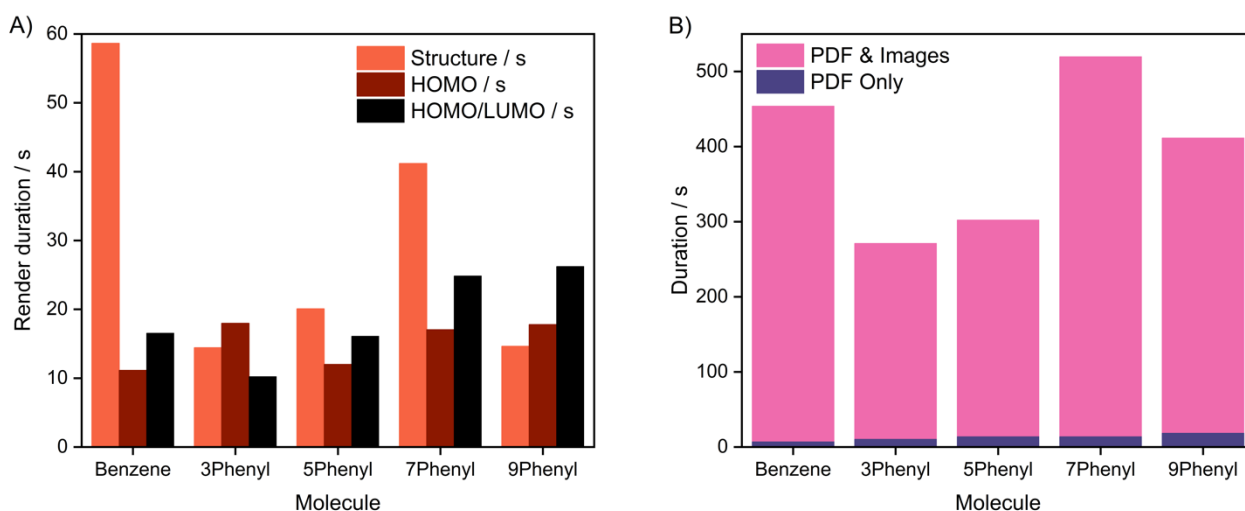

**Figure S4.** Duration of each image render (a) and PDF report generation (b).

## Report generation

The report generation process consists of two broad steps. First, each of the required 3D images is rendered, followed by the PDF writing itself. The number of images included in each PDF is customizable by the user (depending on how many orbitals they wish to visualise etc.) and the type of calculation. Generally, excited-state calculations (which include natural-transition orbitals and/or difference density plots) include more images. In the calculations tested here, each report contained 6 different types of images (the total SCF electron density, the structure (no isosurfaces), the structure with the permanent dipole moment vector, the HOMO, the LUMO, and the HOMO/LUMO simultaneously). The time required to generate each report in its entirety (**Figure S4b**, pink bars) varied without much pattern from molecule to molecule and took on average 3.5 min ( $\pm 1.7$  min). Between **3Phenyl**, **5Phenyl**, and **9Phenyl** there is some suggestion that the larger oligomers resulted in longer report writing, but the pattern is not observable in **Benzene** or **7Phenyl**. In all cases, the time required to write the PDF file itself was only a small fraction of the overall process, taking 13 s ( $\pm 4$  s) on average (**Figure S4b**, purple bars). This indicates that the number of images in the report is the main determining factor for the overall report writing duration, rather than the log file size.

**Table S1.** Log file parsing duration.

| Molecule       | Log file size / MB | Parsing duration / s   |            |           |         |
|----------------|--------------------|------------------------|------------|-----------|---------|
|                |                    | First run (discounted) | Second run | Third run | Average |
| <b>Benzene</b> | 0.9                | 33                     | 2          | 2         | 2       |
| <b>3Phenyl</b> | 5.7                | 4                      | 4          | 4         | 4       |

|                |      |     |    |    |    |
|----------------|------|-----|----|----|----|
| <b>5Phenyl</b> | 14.2 | 7   | 7  | 6  | 6  |
| <b>7Phenyl</b> | 17.7 | 95  | 9  | 8  | 8  |
| <b>9Phenyl</b> | 28.7 | 114 | 12 | 12 | 12 |
| Average        |      |     |    |    | 6  |
| Deviation      |      |     |    |    | 4  |

**Table S2.** PDF file writing duration.

| <b>Molecule</b> | <b>Log file size / MB</b> | <b>PDF Generation / s</b>     |                   |                  |                |
|-----------------|---------------------------|-------------------------------|-------------------|------------------|----------------|
|                 |                           | <b>First run (discounted)</b> | <b>Second run</b> | <b>Third run</b> | <b>Average</b> |
| <b>Benzene</b>  | 0.9                       | 7                             | 7                 | 7                | 7              |
| <b>3Phenyl</b>  | 5.7                       | 13                            | 11                | 10               | 10             |
| <b>5Phenyl</b>  | 14.2                      | 15                            | 14                | 14               | 14             |
| <b>7Phenyl</b>  | 17.7                      | 77                            | 14                | 14               | 14             |
| <b>9Phenyl</b>  | 28.7                      | 105                           | 18                | 19               | 18             |
| Average         |                           |                               |                   |                  | 13             |
| Deviation       |                           |                               |                   |                  | 4              |

**Table S3.** Image rendering and total report generation duration.

| <b>Molecule</b> | <b>Image rendering duration / s</b> |             |                  | <b>Total report generation duration / s</b> |
|-----------------|-------------------------------------|-------------|------------------|---------------------------------------------|
|                 | <b>Structure</b>                    | <b>HOMO</b> | <b>HOMO/LUMO</b> |                                             |
| <b>Benzene</b>  | 59                                  | 11          | 17               | 454                                         |
| <b>3Phenyl</b>  | 14                                  | 18          | 10               | 271                                         |
| <b>5Phenyl</b>  | 20                                  | 12          | 16               | 302                                         |
| <b>7Phenyl</b>  | 41                                  | 17          | 25               | 520                                         |
| <b>9Phenyl</b>  | 15                                  | 18          | 26               | 412                                         |
| Average         | 30                                  | 15          | 19               | 392                                         |
| Deviation       | 20                                  | 3           | 7                | 104                                         |

## Molecular alignment procedures

Digichem supports three different molecular alignment procedures to re-orientate the molecular geometry, called **Symmetry (SYM)**, **Average angle (AA)**, and **Furthest atom pair (FAP)**. **FAP** is *ab initio* and is entirely implemented in Digichem, while **SYM** and **AA** rely on the symmetry detection algorithm of the computational engine. The performance of these methods has been previously benchmarked elsewhere,<sup>13,14</sup> but in summary **SYM** typically performs the best so long as the computational engine implements a robust symmetry detection algorithm. For computational programs where symmetry is not routinely used (Orca, for example), **FAP** offers a reasonable fallback method. The performance of **FAP** and **AA** is normally similar, but **FAP** is more widely available as it does not rely on symmetry detection. The implementation of each method is briefly described below, see ref.<sup>13</sup> for more information.

In all cases, the longest identified molecular axis is rotated to coincide with the x-axis, while the second longest axis (confined to be at 90° to the long axis) is rotated to coincide with the y-axis.

### Symmetry (SYM)

The molecule is aligned by the computational engine according to its detected symmetry. Exactly how this is done depends on the computational program, but typically the principal axis of symmetry (having the highest order) is rotated to coincide with one of the cartesian axes (often the y axis, although which does not matter). The molecule is then rotated by Digichem about its origin so that the greatest maximum difference in coordinates is in the x-axis, and the second most in the y-axis. The position of the origin is determined by the computational engine, and typically it is the molecule's centre of mass.

### Average Angle (AA)

The molecule is first fully aligned using the **SYM** procedure before being translated so that the molecular origin is the centre of coordinates (**Equation S1**).

$$(\bar{x}, \bar{y}, \bar{z}) = \frac{1}{n} \sum_{j=1}^n (x_j, y_j, z_j) \quad \text{Equation S1}$$

Where  $(x_j, y_j, z_j)$  are the coordinates for atom  $j$  and  $n$  is the total number of atoms.

$$\bar{c} = \frac{1}{n} \sum_{j=1}^n \cos(\theta_j) \quad \text{Equation S2}$$



$$\bar{S} = \frac{1}{n} \sum_{j=1}^n \sin(\theta_j) \quad \text{Equation S3}$$

$$\bar{\theta} = \begin{cases} \tan^{-1}\left(\frac{\bar{S}}{\bar{C}}\right) & \bar{C} > 0, \bar{S} > 0 \\ \tan^{-1}\left(\frac{\bar{S}}{\bar{C}}\right) + \pi & \bar{C} > 0 \\ \tan^{-1}\left(\frac{\bar{S}}{\bar{C}}\right) + 2\pi & \text{otherwise} \end{cases} \quad \text{Equation S4}$$

Where  $\theta_j$  is the angle of the coordinates of atom  $j$  in a specific plane.

The molecule is then rotated in the XY-plane by the average angle (calculated according to Mardia and Jupp,<sup>15</sup> **Equation S4**) of each atom (in the same plane). This process is then repeated for the XZ- and YZ-planes, before the molecule is finally rotated about its origin so that the greatest maximum difference in coordinates is in the x-axis, and the second most in the y-axis.

## Furthest Atom Point (FAP)

Every unique pair of atoms in the molecule is iterated over to determine the pair with the greatest linear distance between them. The molecule is then translated so that the point equidistant between these two atoms becomes the origin, and rotated about this new origin so that the vector defined by this furthest atom pair coincides with the x-axis. The pair of atoms with the greatest linear distance in the newly defined YZ-plane is then found, and the molecule is rotated so the vector defined by these two points is parallel to the y-axis.

## Additional graphs and figures

a) 

```
basis_set:
  internal: 6-31G*
meta:
  class_name: Gaussian
  name: Optimisation
method:
  dft:
    calc: true
    dispersion: GD3BJ
    functional: PBE0
performance:
  memory: 2GB
  num_cpu: 2
properties:
  opt:
    calc: true
solution:
  calc: true
  solvent: Toluene
```

b) 

```
basis_set:
  internal: 6-31G*
meta:
  class_name: Turbomole
  name: Optimisation
method:
  dft:
    calc: true
    dispersion: GD3BJ
    functional: PBE0
performance:
  memory: 2GB
  num_cpu: 2
properties:
  opt:
    calc: true
solution:
  calc: true
  solvent: Toluene
```

c) 

```
basis_set:
  internal: 6-31G*
meta:
  class_name: Orca
  name: Optimisation
method:
  dft:
    calc: true
    dispersion: GD3BJ
    functional: PBE0
performance:
  memory: 2GB
  num_cpu: 2
properties:
  opt:
    calc: true
solution:
  calc: true
  solvent: Toluene
```

**Figure S5.** Comparison of the method file format for three equivalent calculations for the calculation engines a) Gaussian, b) Turbomole, and c) Orca.

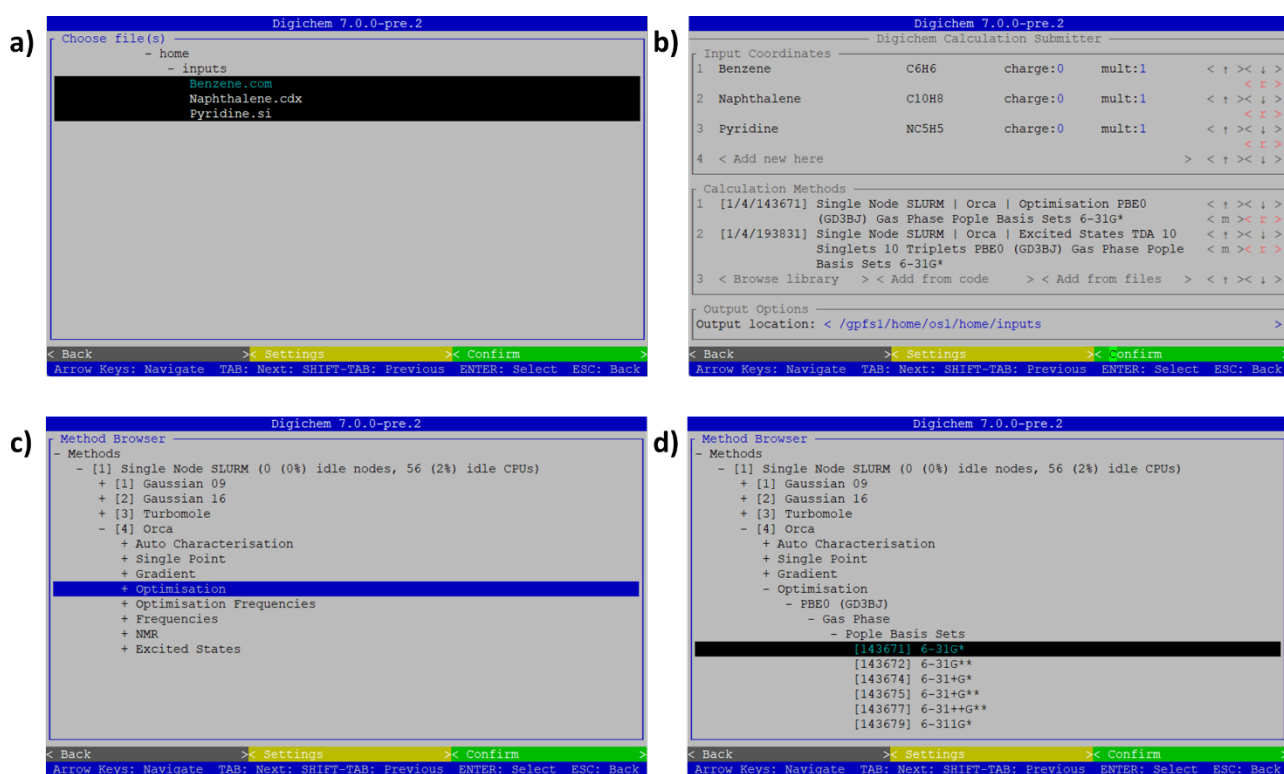

**Figure S6.** Screenshots of the submission sub-module showing simultaneous set-up of three molecules (benzene, naphthalene, and pyridine) to be performed in parallel and two calculations (a geometry optimisation followed by TD-DFT excited-states calculation at the PBE0/6-31G\*\* level of theory) to be performed in series. a) input coordinate file-picker. b) main submission interface.

c) internal method library, from which the calculation can be chosen. d) the same method library, but further expanded to show more options.

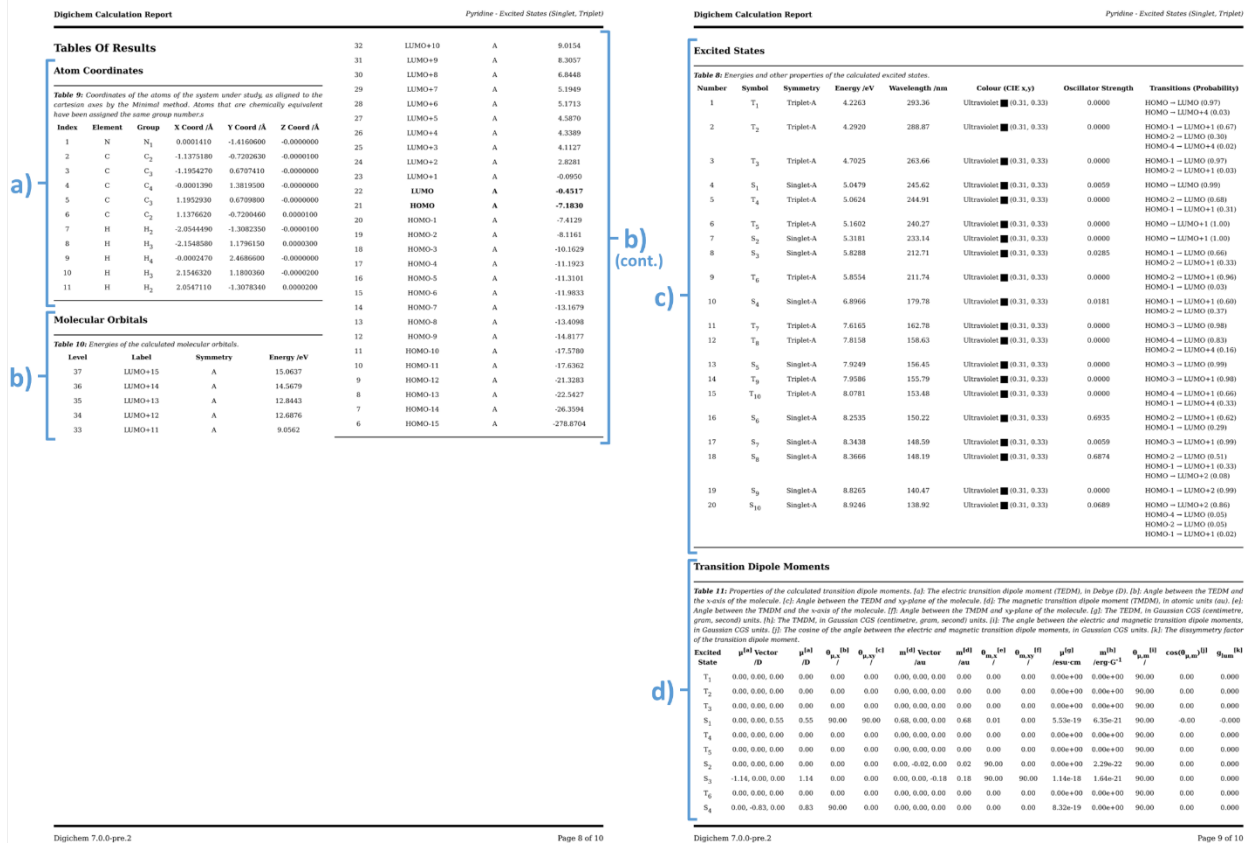

**Figure S7.** Excerpts from an example calculation report generated by Digichem, demonstrating tabulated data. The excited states of pyridine at the PBE0/6-31G\* level of theory using the Tamm-Dancoff approximation (TDA) to time-dependent DFT (TD-DFT) were calculated. a) table of molecular geometry, b) table of selected molecular orbitals, c) table of electronic excited states, d) table of transition dipole moments.

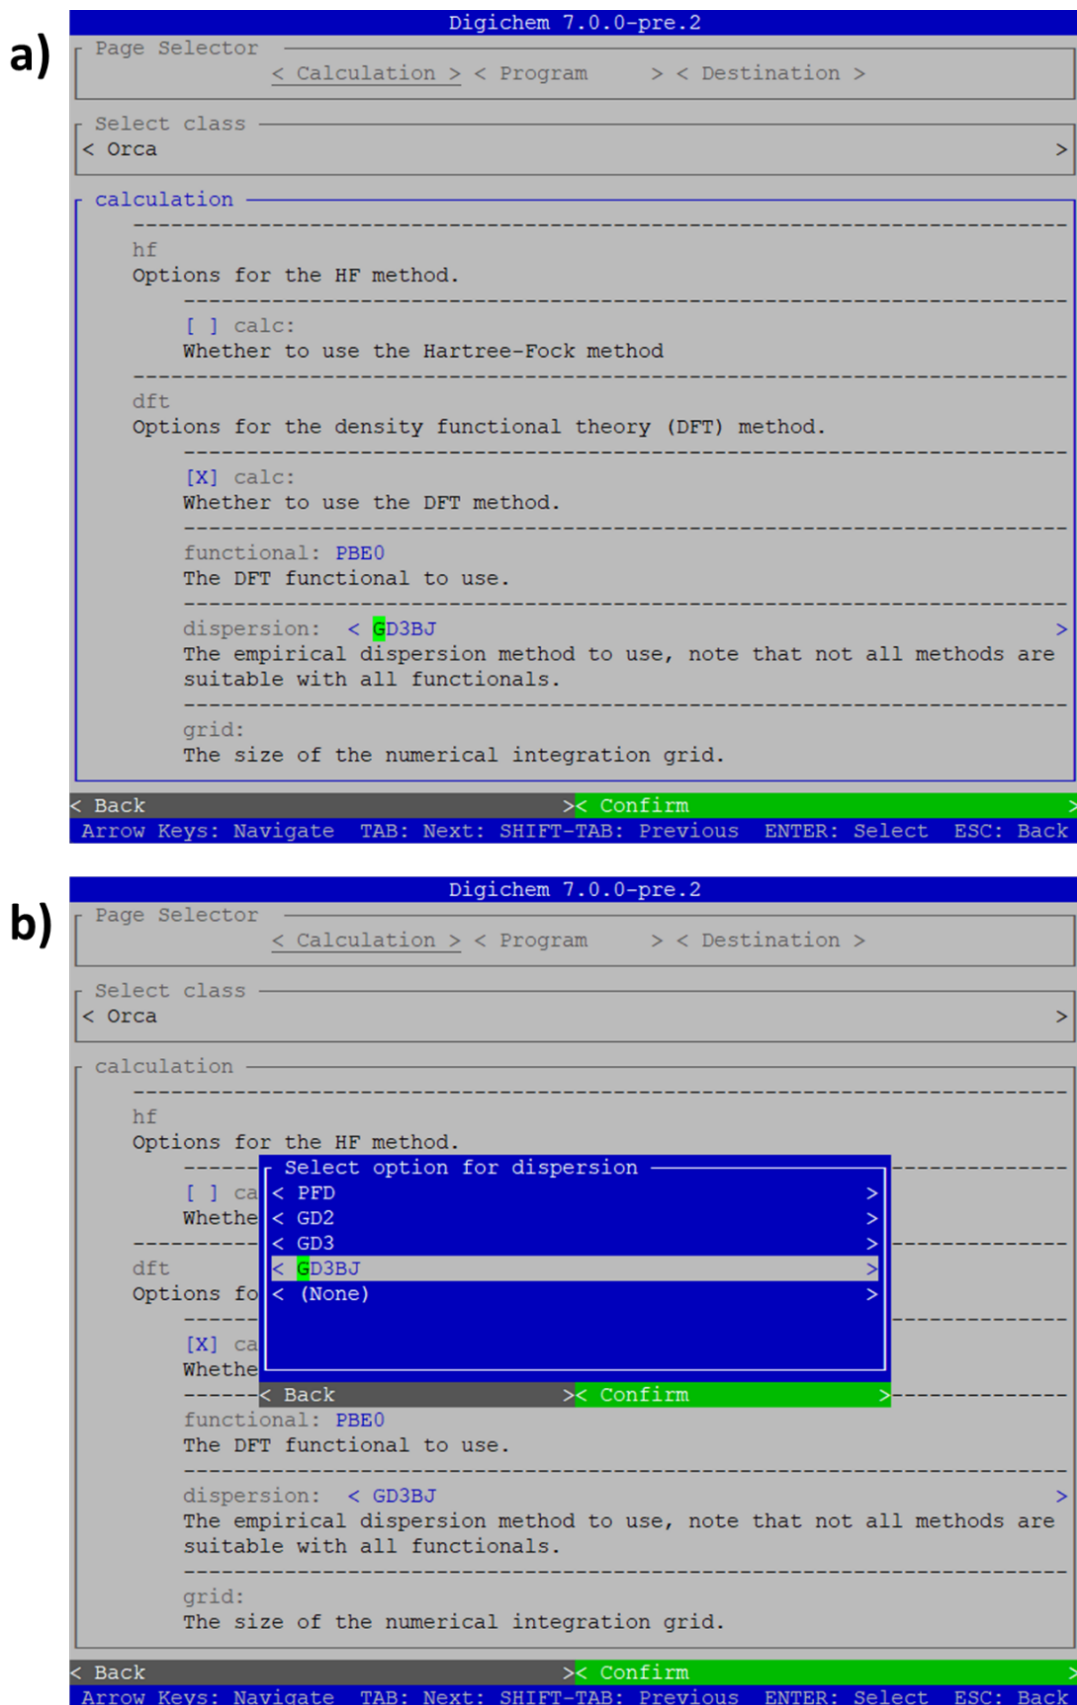

**Figure S8.** Screenshots of the calculation method editor interface. a) general overview, showing example options for the calculation level of theory. b) example validation for the DFT dispersion correction option.

```

1  id
2  -----
3  203e80e7acc83845224fbel59f785d7db8aaab3d
4  -----
5
6  metadata
7  -----
8  name Naphthalene
9  log_files Output/Naphthalene.log
10 auxiliary_files:fchk_file Output/Naphthalene.fchk
11 auxiliary_files:chk_file Output/Naphthalene.chk
12 auxiliary_files:rwf_file Output/Naphthalene.rwf
13 history
14 charge 0.00
15 multiplicity 1.00
16 user os1
17 package Gaussian
18 package_version 2016+C.01
19 silico_version 3.1.0
20 calculations
21 methods DFT
22 functional FBE1PBE
23 basis_set 6-31G(d)
24 orbital_spin_type restricted
25 success True
26 optimisation_converged True
27 date / s 1695642681.00
28 date:string 25/09/2023 12:51:21
29 duration / s 85.90
30 duration:string 1 m, 26 s
31 temperature / K
32 pressure / atm
33 -----
34
35 ground_state
36 -----
37 index 0.00
38 symbol S(0)
39 charge 0.00
40 multiplicity 1.00
41 multiplicity_index 0
42 energy / eV -10488.61
43 -----
44
45 energies
46 -----
47 final / eV -10488.6
48 scf:num_steps 4
49 scf:final / eV -10488.6
50 mprnum_steps 0
51 mp:final / eV
52 mp:order 0
53 cc:num_steps 0
54 cc:final / eV
55 -----
56
57 atoms
58 -----
59 formula C10H8
60 charge 0.00
61 smiles c1ccc2c(c1)cccc2
62 exact_mass / g mol^-1 128.06
63 molar_mass / g mol^-1 128.17
64 num_atoms 18.00
65 x-extension / Å 6.74
66 y-extension / Å 4.97
67 z-extension / Å 0.00
68 linearity_ratio 0.26
69 planarity_ratio 1.00
70 alignment_method Minimal
71 -----
72
73 orbitals
74 -----
75 dE(HOMO-LUMO) / eV 5.21
76 num_occupied 34.00
77 num_virtual 132.00
78 spin_type none
79 -----
80
81 orbitals:HOMO
82 -----
83 index 34.00
84 label HOMO
85 homo_distance 0.00
86 energy / eV -6.06
87 symmetry A
88 -----
89
90 symmetry_index 34.00
91 -----
92
93 orbitals:LUMO
94 -----
95 index 35.00
96 label LUMO
97 homo_distance 1.00
98 energy / eV -0.85
99 symmetry A
100 symmetry_index 35.00
101 -----
102
103 beta_orbitals
104 -----
105 dE(HOMO-LUMO) / eV
106 num_occupied / eV
107 num_virtual 0
108 spin_type 0
109 -----
110
111 pdm
112 -----
113 total / D 0
114 origin:x / Å 0
115 origin:y / Å 0
116 origin:z / Å 0
117 vector:x / D 0
118 vector:y / D 0
119 vector:z / D -90
120 x-angle / deg 0
121 xy-angle / deg 90
122 -----
123
124 vibrations
125 -----
126 num_vibrations 0
127 num_negative 0
128 -----

```

Figure S9. Excerpts from an example result summary output file written by Digichem.

**Tables Of Results**

Table 9: Coordinates of the atoms of the system under study, as aligned to the cartesian axes by the Minimal method. Atoms that are chemically equivalent have obtained the same group numbers.

| Index | Element | Group          | X Coord / Å | Y Coord / Å | Z Coord / Å |
|-------|---------|----------------|-------------|-------------|-------------|
| 1     | H       | N <sub>1</sub> | 0.0001410   | -1.165680   | 0.0000000   |
| 2     | C       | C <sub>1</sub> | 1.1373180   | -0.7202630  | 0.0000100   |
| 3     | C       | C <sub>2</sub> | -1.1954270  | 0.6797410   | 0.0000000   |
| 4     | C       | C <sub>3</sub> | -0.9001390  | 1.3819500   | 0.0000000   |
| 5     | C       | C <sub>4</sub> | 1.1952930   | 0.6799800   | 0.0000000   |
| 6     | C       | C <sub>5</sub> | 1.1376620   | -0.7200460  | 0.0000100   |
| 7     | H       | H <sub>2</sub> | -2.0544390  | -1.3082350  | 0.0000100   |
| 8     | H       | H <sub>3</sub> | -2.1548580  | 1.1798150   | 0.0000300   |
| 9     | H       | H <sub>4</sub> | -0.9002470  | 2.4689600   | 0.0000000   |
| 10    | H       | H <sub>5</sub> | 2.1544320   | 1.1800360   | 0.0000200   |
| 11    | H       | H <sub>6</sub> | 2.0547110   | -1.3078340  | 0.0000200   |

**Molecular Orbitals**

Table 10: Energies of the calculated molecular orbitals.

| Level | Label   | Symmetry | Energy / eV |
|-------|---------|----------|-------------|
| 37    | LUMO+15 | A        | 15.9637     |
| 36    | LUMO+14 | A        | 14.5679     |
| 35    | LUMO+13 | A        | 12.8443     |
| 34    | LUMO+12 | A        | 12.6876     |
| 33    | LUMO+11 | A        | 9.9562      |

**Excited States**

Table 8: Energies and other properties of the calculated excited states.

| Number | Symbol          | Symmetry  | Energy / eV | Wavelength / nm | Colour (CIEx) | Oscillator Strength | Transitions (Probability)                                            |
|--------|-----------------|-----------|-------------|-----------------|---------------|---------------------|----------------------------------------------------------------------|
| 1      | T <sub>1</sub>  | Triplet-A | 4.2263      | 293.36          | Ultraviolet   | 0.0000              | HOMO - LUMO (0.97)<br>HOMO - LUMO+4 (0.03)                           |
| 2      | T <sub>2</sub>  | Triplet-A | 4.2929      | 288.87          | Ultraviolet   | 0.0000              | HOMO - LUMO+1 (0.67)<br>HOMO - LUMO+1 (0.30)<br>HOMO - LUMO+4 (0.02) |
| 3      | T <sub>3</sub>  | Triplet-A | 4.7025      | 263.66          | Ultraviolet   | 0.0000              | HOMO - LUMO (0.97)<br>HOMO - LUMO+1 (0.03)                           |
| 4      | S <sub>1</sub>  | Singlet-A | 5.0479      | 245.62          | Ultraviolet   | 0.0059              | HOMO - LUMO (0.99)                                                   |
| 5      | T <sub>4</sub>  | Triplet-A | 5.0624      | 244.91          | Ultraviolet   | 0.0000              | HOMO - LUMO (0.88)<br>HOMO - LUMO+1 (0.33)                           |
| 6      | T <sub>5</sub>  | Triplet-A | 5.1602      | 240.27          | Ultraviolet   | 0.0000              | HOMO - LUMO+1 (1.00)                                                 |
| 7      | S <sub>2</sub>  | Singlet-A | 5.3181      | 233.14          | Ultraviolet   | 0.0000              | HOMO - LUMO+1 (1.00)                                                 |
| 8      | S <sub>3</sub>  | Singlet-A | 5.8288      | 212.71          | Ultraviolet   | 0.0285              | HOMO - LUMO (0.66)<br>HOMO - LUMO+1 (0.33)                           |
| 9      | T <sub>6</sub>  | Triplet-A | 5.8554      | 211.74          | Ultraviolet   | 0.0000              | HOMO - LUMO+1 (0.96)<br>HOMO - LUMO+2 (0.03)                         |
| 10     | S <sub>4</sub>  | Singlet-A | 6.8966      | 179.78          | Ultraviolet   | 0.0181              | HOMO - LUMO+1 (0.60)<br>HOMO - LUMO+2 (0.37)                         |
| 11     | T <sub>7</sub>  | Triplet-A | 7.6165      | 162.78          | Ultraviolet   | 0.0000              | HOMO - LUMO (0.98)<br>HOMO - LUMO+1 (0.02)                           |
| 12     | T <sub>8</sub>  | Triplet-A | 7.8158      | 158.63          | Ultraviolet   | 0.0000              | HOMO - LUMO+1 (0.83)<br>HOMO - LUMO+2 (0.16)                         |
| 13     | S <sub>5</sub>  | Singlet-A | 7.9249      | 156.45          | Ultraviolet   | 0.0000              | HOMO - LUMO (0.99)                                                   |
| 14     | T <sub>9</sub>  | Triplet-A | 7.9586      | 155.79          | Ultraviolet   | 0.0000              | HOMO - LUMO+1 (0.98)<br>HOMO - LUMO+2 (0.02)                         |
| 15     | T <sub>10</sub> | Triplet-A | 8.0781      | 153.48          | Ultraviolet   | 0.0000              | HOMO - LUMO+1 (0.66)<br>HOMO - LUMO+4 (0.33)                         |
| 16     | S <sub>6</sub>  | Singlet-A | 8.2535      | 150.22          | Ultraviolet   | 0.6935              | HOMO - LUMO+1 (0.62)<br>HOMO - LUMO+2 (0.38)                         |
| 17     | S <sub>7</sub>  | Singlet-A | 8.3438      | 148.59          | Ultraviolet   | 0.0059              | HOMO - LUMO+1 (0.99)                                                 |
| 18     | S <sub>8</sub>  | Singlet-A | 8.3666      | 148.19          | Ultraviolet   | 0.0874              | HOMO - LUMO+1 (0.33)<br>HOMO - LUMO+2 (0.66)                         |
| 19     | S <sub>9</sub>  | Singlet-A | 8.8265      | 140.47          | Ultraviolet   | 0.0000              | HOMO - LUMO+2 (0.99)                                                 |
| 20     | S <sub>10</sub> | Singlet-A | 8.9246      | 138.92          | Ultraviolet   | 0.0689              | HOMO - LUMO+2 (0.86)<br>HOMO - LUMO (0.13)<br>HOMO - LUMO+1 (0.01)   |

**Transition Dipole Moments**

Table 11: Properties of the calculated transition dipole moments. [a]: The electric transition dipole moment (TDEM), in Debye (D). [b]: Angle between the TDEM and the axis of the molecule. [c]: Angle between the TDEM and x-plane of the molecule. [d]: The magnetic transition dipole moment (TMDM), in atomic units (au). [e]: Angle between the TMDM and the axis of the molecule. [f]: Angle between the TMDM and y-plane of the molecule. [g]: The TDEM, in Gaussian CGS (centimetre, gram, second) units. [h]: The TMDM, in Gaussian CGS (centimetre, gram, second) units. [i]: The angle between the electric and magnetic transition dipole moments, in Gaussian CGS units. [j]: The cosine of the angle between the electric and magnetic transition dipole moments, in Gaussian CGS units. [k]: The dissymmetry factor of the transition dipole moment.

| Excited State  | $\mu^{\text{el}} / \text{D}$ | $\mu^{\text{mag}} / \text{au}$ | $\theta_{\text{el}} / \text{deg}$ | $\theta_{\text{mag}} / \text{deg}$ | $\theta_{\text{el, mag}} / \text{deg}$ | $\mu^{\text{el}} / \text{esu-cm}$ | $\mu^{\text{mag}} / \text{erg G}^{-1}$ | $\theta_{\text{el}} / \text{deg}$ | $\theta_{\text{mag}} / \text{deg}$ | $\cos(\theta_{\text{el, mag}})$ | $\text{DF}_{\text{dissym}}$ |      |
|----------------|------------------------------|--------------------------------|-----------------------------------|------------------------------------|----------------------------------------|-----------------------------------|----------------------------------------|-----------------------------------|------------------------------------|---------------------------------|-----------------------------|------|
| T <sub>1</sub> | 0.00, 0.00, 0.00             | 0.00                           | 0.00                              | 0.00                               | 0.00                                   | 0.00e+00                          | 0.00e+00                               | 90.00                             | 0.00                               | 0.00                            | 0.000                       |      |
| T <sub>2</sub> | 0.00, 0.00, 0.00             | 0.00                           | 0.00                              | 0.00                               | 0.00                                   | 0.00e+00                          | 0.00e+00                               | 90.00                             | 0.00                               | 0.00                            | 0.000                       |      |
| T <sub>3</sub> | 0.00, 0.00, 0.00             | 0.00                           | 0.00                              | 0.00                               | 0.00                                   | 0.00e+00                          | 0.00e+00                               | 90.00                             | 0.00                               | 0.00                            | 0.000                       |      |
| S <sub>1</sub> | 0.00, 0.00, 0.55             | 0.55                           | 99.00                             | 90.00                              | 0.00, 0.00, 0.00                       | 0.01                              | 0.00                                   | 1.53e+19                          | 6.26e+21                           | 90.00                           | -0.00                       |      |
| T <sub>4</sub> | 0.00, 0.00, 0.00             | 0.00                           | 0.00                              | 0.00                               | 0.00                                   | 0.00e+00                          | 0.00e+00                               | 90.00                             | 0.00                               | 0.00                            | 0.000                       |      |
| T <sub>5</sub> | 0.00, 0.00, 0.00             | 0.00                           | 0.00                              | 0.00                               | 0.00                                   | 0.00e+00                          | 0.00e+00                               | 90.00                             | 0.00                               | 0.00                            | 0.000                       |      |
| S <sub>2</sub> | 0.00, 0.00, 0.00             | 0.00                           | 0.00                              | 0.00                               | -0.02, 0.00, 0.02                      | 90.00                             | 0.00                                   | 0.00e+00                          | 2.29e+22                           | 90.00                           | 0.00                        |      |
| S <sub>3</sub> | -1.14, 0.00, 0.00            | 1.14                           | 0.00                              | 0.00                               | 0.00, 0.00, -0.18                      | 0.18                              | 90.00                                  | 1.14e+18                          | 1.64e+21                           | 90.00                           | 0.00                        |      |
| T <sub>6</sub> | 0.00, 0.00, 0.00             | 0.00                           | 0.00                              | 0.00                               | 0.00, 0.00, 0.00                       | 0.00                              | 0.00                                   | 0.00e+00                          | 0.00e+00                           | 90.00                           | 0.00                        |      |
| S <sub>4</sub> | 0.00, -0.83, 0.00            | 0.83                           | 90.00                             | 0.00                               | 0.00, 0.00, 0.00                       | 0.00                              | 0.00                                   | 0.00                              | 8.32e+19                           | 0.00e+00                        | 90.00                       | 0.00 |

Figure S10. Excerpts from an example calculation report generated by Digichem, demonstrating tabulated data. The excited states of pyridine at the PBE0/6-31G\* level of theory using the Tamm-Dancoff approximation (TDA) to time-dependent DFT (TD-DFT) were calculated. a) table of

molecular geometry, b) table of selected molecular orbitals, c) table of electronic excited states, d) table of transition dipole moments.

**Table S4.** Table of supported input file types.

| Code    | Description                               | Read | Write | C&M |
|---------|-------------------------------------------|------|-------|-----|
| abinit  | ABINIT Output Format                      | ✓    | ✗     | ✗   |
| acesin  | ACES input format                         | ✗    | ✓     | ✗   |
| acesout | ACES output format                        | ✓    | ✗     | ✗   |
| acr     | ACR format                                | ✓    | ✗     | ✗   |
| adf     | ADF cartesian input format                | ✗    | ✓     | ✗   |
| adfband | ADF Band output format                    | ✓    | ✗     | ✗   |
| adfdftb | ADF DFTB output format                    | ✓    | ✗     | ✗   |
| adfout  | ADF output format                         | ✓    | ✗     | ✗   |
| alc     | Alchemy format                            | ✓    | ✓     | ✗   |
| aoforce | Turbomole AOFORCE output format           | ✓    | ✗     | ✗   |
| arc     | Accelrys/MSI Biosym/Insight II CAR format | ✓    | ✗     | ✗   |
| ascii   | ASCII format                              | ✗    | ✓     | ✗   |
| axsf    | XCrySDen Structure Format                 | ✓    | ✗     | ✗   |
| bgf     | MSI BGF format                            | ✓    | ✓     | ✗   |
| box     | Dock 3.5 Box format                       | ✓    | ✓     | ✗   |
| bs      | Ball and Stick format                     | ✓    | ✓     | ✗   |
| c09out  | Crystal 09 output format                  | ✓    | ✗     | ✗   |
| c3d1    | Chem3D Cartesian 1 format                 | ✓    | ✓     | ✗   |
| c3d2    | Chem3D Cartesian 2 format                 | ✓    | ✓     | ✗   |
| cac     | CAChe MolStruct format                    | ✗    | ✓     | ✗   |
| cacert  | Cacao Cartesian format                    | ✓    | ✓     | ✗   |
| cache   | CAChe MolStruct format                    | ✗    | ✓     | ✗   |
| cacint  | Cacao Internal format                     | ✗    | ✓     | ✗   |
| can     | Canonical SMILES format                   | ✓    | ✓     | ✗   |
| car     | Accelrys/MSI Biosym/Insight II CAR format | ✓    | ✗     | ✗   |
| castep  | CASTEP format                             | ✓    | ✗     | ✗   |
| ccc     | CCC format                                | ✓    | ✗     | ✗   |
| cdjson  | ChemDoodle JSON                           | ✓    | ✓     | ✗   |
| cdx     | ChemDraw binary format                    | ✓    | ✗     | ✗   |
| cdxml   | ChemDraw CDXML format                     | ✓    | ✓     | ✗   |
| cht     | Chemtool format                           | ✗    | ✓     | ✗   |
| cif     | Crystallographic Information File         | ✓    | ✓     | ✗   |
| ck      | ChemKin format                            | ✓    | ✓     | ✗   |
| cml     | Chemical Markup Language                  | ✓    | ✓     | ✗   |
| cmlr    | CML Reaction format                       | ✓    | ✓     | ✗   |

**Table S4.** Table of supported input file types.

| Code         | Description                               | Read | Write | C&M |
|--------------|-------------------------------------------|------|-------|-----|
| cof          | Culgi object file format                  | ✓    | ✓     | ✗   |
| com          | Gaussian Input                            | ✓    | ✓     | ✓   |
| confabreport | Confab report format                      | ✗    | ✓     | ✗   |
| CONFIG       | DL-POLY CONFIG                            | ✓    | ✓     | ✗   |
| CONTCAR      | VASP format                               | ✓    | ✓     | ✗   |
| CONTFE       | MDFF format                               | ✓    | ✓     | ✗   |
| crk2d        | Chemical Resource Kit diagram(2D)         | ✓    | ✓     | ✗   |
| crk3d        | Chemical Resource Kit 3D format           | ✓    | ✓     | ✗   |
| csr          | Accelrys/MSI Quanta CSR format            | ✗    | ✓     | ✗   |
| cssr         | CSD CSSR format                           | ✗    | ✓     | ✗   |
| ct           | ChemDraw Connection Table format          | ✓    | ✓     | ✗   |
| cub          | Gaussian cube format                      | ✓    | ✓     | ✗   |
| cube         | Gaussian cube format                      | ✓    | ✓     | ✗   |
| dalog        | DALTON output format                      | ✓    | ✗     | ✗   |
| dalmol       | DALTON input format                       | ✓    | ✓     | ✓   |
| dat          | Generic Output file format                | ✓    | ✗     | ✗   |
| dmol         | DMol3 coordinates format                  | ✓    | ✓     | ✗   |
| dx           | OpenDX cube format for APBS               | ✓    | ✓     | ✗   |
| ent          | Protein Data Bank format                  | ✓    | ✓     | ✗   |
| exyz         | Extended XYZ cartesian coordinates format | ✓    | ✓     | ✗   |
| fa           | FASTA format                              | ✓    | ✓     | ✗   |
| fasta        | FASTA format                              | ✓    | ✓     | ✗   |
| fch          | Gaussian formatted checkpoint file format | ✓    | ✗     | ✗   |
| fchk         | Gaussian formatted checkpoint file format | ✓    | ✗     | ✗   |
| fck          | Gaussian formatted checkpoint file format | ✓    | ✗     | ✗   |
| feat         | Feature format                            | ✓    | ✓     | ✗   |
| fh           | Fenske-Hall Z-Matrix format               | ✗    | ✓     | ✗   |
| fhiaims      | FHiaims XYZ format                        | ✓    | ✓     | ✗   |
| fix          | SMILES FIX format                         | ✗    | ✓     | ✗   |
| fps          | FPS text fingerprint format (Dalke)       | ✗    | ✓     | ✗   |
| fpt          | Fingerprint format                        | ✗    | ✓     | ✗   |
| fract        | Free Form Fractional format               | ✓    | ✓     | ✗   |
| fs           | Fastsearch format                         | ✓    | ✓     | ✗   |
| fsa          | FASTA format                              | ✓    | ✓     | ✗   |
| g03          | Gaussian Output                           | ✓    | ✗     | ✗   |
| g09          | Gaussian Output                           | ✓    | ✗     | ✗   |
| g16          | Gaussian Output                           | ✓    | ✗     | ✗   |
| g92          | Gaussian Output                           | ✓    | ✗     | ✗   |
| g94          | Gaussian Output                           | ✓    | ✗     | ✗   |
| g98          | Gaussian Output                           | ✓    | ✗     | ✗   |

**Table S4.** Table of supported input file types.

| Code     | Description                             | Read | Write | C&M |
|----------|-----------------------------------------|------|-------|-----|
| gal      | Gaussian Output                         | ✓    | ✗     | ✗   |
| gam      | GAMESS Output                           | ✓    | ✗     | ✗   |
| gamess   | GAMESS Output                           | ✓    | ✗     | ✗   |
| gamin    | GAMESS Input                            | ✓    | ✓     | ✗   |
| gamout   | GAMESS Output                           | ✓    | ✗     | ✗   |
| gau      | Gaussian Input                          | ✓    | ✓     | ✓   |
| gjc      | Gaussian Input                          | ✓    | ✓     | ✓   |
| gjf      | Gaussian Input                          | ✓    | ✓     | ✓   |
| got      | GULP format                             | ✓    | ✗     | ✗   |
| gpr      | Ghemical format                         | ✓    | ✓     | ✗   |
| gr96     | GROMOS96 format                         | ✗    | ✓     | ✗   |
| gro      | GRO format                              | ✓    | ✓     | ✗   |
| gukin    | GAMESS-UK Input                         | ✓    | ✓     | ✗   |
| gukout   | GAMESS-UK Output                        | ✓    | ✓     | ✗   |
| gzmat    | Gaussian Z-Matrix Input                 | ✓    | ✓     | ✓   |
| hin      | HyperChem HIN format                    | ✓    | ✓     | ✗   |
| HISTORY  | DL-POLY HISTORY                         | ✓    | ✗     | ✗   |
| inchi    | InChI format                            | ✓    | ✓     | ✗   |
| inchikey | InChIKey                                | ✗    | ✓     | ✗   |
| inp      | GAMESS Input                            | ✓    | ✓     | ✗   |
| ins      | ShelX format                            | ✓    | ✗     | ✗   |
| jin      | Jaguar input format                     | ✓    | ✓     | ✗   |
| jout     | Jaguar output format                    | ✓    | ✗     | ✗   |
| k        | Compare molecules using InChI           | ✗    | ✓     | ✗   |
| lmpdat   | The LAMMPS data format                  | ✗    | ✓     | ✗   |
| log      | Generic Output file format              | ✓    | ✗     | ✗   |
| lpmd     | LPMD format                             | ✓    | ✓     | ✗   |
| mccl     | MCDL format                             | ✓    | ✓     | ✗   |
| mcif     | Macromolecular Crystallographic Info    | ✓    | ✓     | ✗   |
| MDFF     | MDFF format                             | ✓    | ✓     | ✗   |
| mdl      | MDL MOL format                          | ✓    | ✓     | ✗   |
| ml2      | Sybyl Mol2 format                       | ✓    | ✓     | ✗   |
| mmcif    | Macromolecular Crystallographic Info    | ✓    | ✓     | ✗   |
| mmd      | MacroModel format                       | ✓    | ✓     | ✗   |
| mmod     | MacroModel format                       | ✓    | ✓     | ✗   |
| mna      | Multilevel Neighborhoods of Atoms (MNA) | ✗    | ✓     | ✗   |
| mol      | MDL MOL format                          | ✓    | ✓     | ✗   |
| mol2     | Sybyl Mol2 format                       | ✓    | ✓     | ✗   |
| mold     | Molden format                           | ✓    | ✓     | ✗   |
| molden   | Molden format                           | ✓    | ✓     | ✗   |



**Table S4.** Table of supported input file types.

| Code       | Description                       | Read | Write | C&M |
|------------|-----------------------------------|------|-------|-----|
| molf       | Molden format                     | ✓    | ✓     | ✗   |
| molreport  | Open Babel molecule report        | ✗    | ✓     | ✗   |
| moo        | MOPAC Output format               | ✓    | ✗     | ✗   |
| mop        | MOPAC Cartesian format            | ✓    | ✓     | ✗   |
| mopert     | MOPAC Cartesian format            | ✓    | ✓     | ✗   |
| mopin      | MOPAC Internal                    | ✓    | ✓     | ✗   |
| mopout     | MOPAC Output format               | ✓    | ✗     | ✗   |
| mp         | Molpro input format               | ✗    | ✓     | ✗   |
| mpc        | MOPAC Cartesian format            | ✓    | ✓     | ✗   |
| mpd        | MolPrint2D format                 | ✗    | ✓     | ✗   |
| mpo        | Molpro output format              | ✓    | ✗     | ✗   |
| mpqc       | MPQC output format                | ✓    | ✗     | ✗   |
| mpqcin     | MPQC simplified input format      | ✗    | ✓     | ✗   |
| mrvt       | Chemical Markup Language          | ✓    | ✓     | ✗   |
| msi        | Accelrys/MSI Cerius II MSI format | ✓    | ✗     | ✗   |
| msms       | M.F. Sanner's MSMS input format   | ✗    | ✓     | ✗   |
| nw         | NWChem input format               | ✗    | ✓     | ✗   |
| nwo        | NWChem output format              | ✓    | ✗     | ✗   |
| orca       | ORCA output format                | ✓    | ✗     | ✗   |
| orcainp    | ORCA input format                 | ✗    | ✓     | ✗   |
| out        | Generic Output file format        | ✓    | ✗     | ✗   |
| outmol     | DMol3 coordinates format          | ✓    | ✓     | ✗   |
| output     | Generic Output file format        | ✓    | ✗     | ✗   |
| paint      | Painter format                    | ✗    | ✓     | ✗   |
| pc         | PubChem format                    | ✓    | ✗     | ✗   |
| pcjson     | PubChem JSON                      | ✓    | ✓     | ✗   |
| pcm        | PCModel Format                    | ✓    | ✓     | ✗   |
| pdb        | Protein Data Bank format          | ✓    | ✓     | ✗   |
| pdbqt      | AutoDock PDBQT format             | ✓    | ✓     | ✗   |
| png        | PNG 2D depiction                  | ✓    | ✓     | ✗   |
| pointcloud | Point cloud on VDW surface        | ✗    | ✓     | ✗   |
| pos        | POS cartesian coordinates format  | ✓    | ✗     | ✗   |
| POSCAR     | VASP format                       | ✓    | ✓     | ✗   |
| POSFF      | MDFFF format                      | ✓    | ✓     | ✗   |
| pov        | POV-Ray input format              | ✗    | ✓     | ✗   |
| pqr        | PQR format                        | ✓    | ✓     | ✗   |
| pqs        | Parallel Quantum Solutions format | ✓    | ✓     | ✗   |
| prep       | Amber Prep format                 | ✓    | ✗     | ✗   |
| pwscf      | PWscf format                      | ✓    | ✗     | ✗   |
| qcin       | Q-Chem input format               | ✗    | ✓     | ✗   |

**Table S4.** Table of supported input file types.

| Code   | Description                       | Read | Write | C&M |
|--------|-----------------------------------|------|-------|-----|
| qcout  | Q-Chem output format              | ✓    | ✗     | ✗   |
| report | Open Babel report format          | ✗    | ✓     | ✗   |
| res    | ShelX format                      | ✓    | ✗     | ✗   |
| rinchi | RInChI                            | ✗    | ✓     | ✗   |
| rsmi   | Reaction SMILES format            | ✓    | ✓     | ✗   |
| rxn    | MDL RXN format                    | ✓    | ✓     | ✗   |
| sd     | MDL MOL format                    | ✓    | ✓     | ✗   |
| sdf    | MDL MOL format                    | ✓    | ✓     | ✗   |
| si     | Silico Input Format               | ✓    | ✓     | ✓   |
| siesta | SIESTA format                     | ✓    | ✗     | ✗   |
| smi    | SMILES format                     | ✓    | ✓     | ✗   |
| smiles | SMILES format                     | ✓    | ✓     | ✗   |
| smy    | SMILES format using Smiley parser | ✓    | ✗     | ✗   |
| stl    | STL 3D-printing format            | ✗    | ✓     | ✗   |
| svg    | SVG 2D depiction                  | ✗    | ✓     | ✗   |
| sy2    | Sybyl Mol2 format                 | ✓    | ✓     | ✗   |
| t41    | ADF TAPE41 format                 | ✓    | ✗     | ✗   |
| tdd    | Thermo format                     | ✓    | ✓     | ✗   |
| therm  | Thermo format                     | ✓    | ✓     | ✗   |
| tmol   | TurboMole Coordinate format       | ✓    | ✓     | ✗   |
| txyz   | Tinker XYZ format                 | ✓    | ✓     | ✗   |
| unxyz  | UniChem XYZ format                | ✓    | ✓     | ✗   |
| VASP   | VASP format                       | ✓    | ✓     | ✗   |
| vmol   | ViewMol format                    | ✓    | ✓     | ✗   |
| wln    | Wiswesser Line Notation           | ✓    | ✗     | ✗   |
| xed    | XED format                        | ✗    | ✓     | ✗   |
| xml    | General XML format                | ✓    | ✗     | ✗   |
| xsf    | XCrySDen Structure Format         | ✓    | ✗     | ✗   |
| xtc    | XTC format                        | ✓    | ✗     | ✗   |
| xyz    | XYZ cartesian coordinates format  | ✓    | ✓     | ✗   |
| yob    | YASARA.org YOB format             | ✓    | ✓     | ✗   |
| zin    | ZINDO input format                | ✗    | ✓     | ✗   |

Recreated from ref.<sup>16</sup> **Read:** Indicates this format can be read. **Write:** indicates this format can be written. **C&M:** Indicates this format supports charge and multiplicity. The ‘com’/‘gjf’, ‘si’, and ‘xyz’ formats are parsed internally. The ‘log’ and related formats are parsed with cclib.<sup>17</sup> The remaining formats are parsed with Open Babel.<sup>18,19</sup>

## References

- 1 M. J. Frisch, G. W. Trucks, H. B. Schlegel, G. E. Scuseria, M. A. Robb, J. R. Cheeseman, G. Scalmani, V. Barone, G. A. Petersson, H. Nakatsuji, X. Li, M. Caricato, A. V. Marenich, J. Bloino, B. G. Janesko, R. Gomperts, B. Mennucci, H. P. Hratchian, J. V. Ortiz, A. F. Izmaylov, J. L. Sonnenberg, D. Williams-Young, F. Ding, F. Lipparini, F. Egidi, J. Goings, B. Peng, A. Petrone, T. Henderson, D. Ranasinghe, V. G. Zakrzewski, J. Gao, N. Rega, G. Zheng, W. Liang, M. Hada, M. Ehara, K. Toyota, R. Fukuda, J. Hasegawa, M. Ishida, T. Nakajima, Y. Honda, O. Kitao, H. Nakai, T. Vreven, K. Throssell, J. A. Montgomery Jr., J. E. Peralta, F. Ogliaro, M. J. Bearpark, J. J. Heyd, E. N. Brothers, K. N. Kudin, V. N. Staroverov, T. A. Keith, R. Kobayashi, J. Normand, K. Raghavachari, A. P. Rendell, J. C. Burant, S. S. Iyengar, J. Tomasi, M. Cossi, J. M. Millam, M. Klene, C. Adamo, R. Cammi, J. W. Ochterski, R. L. Martin, K. Morokuma, O. Farkas, J. B. Foresman and D. J. Fox, Gaussian 16, Revision C.01 2016.
- 2 J. P. Perdew, K. Burke and M. Ernzerhof, *Phys. Rev. Lett.*, 1997, **78**, 1396–1396.
- 3 J. P. Perdew, K. Burke and M. Ernzerhof, *Phys. Rev. Lett.*, 1996, **77**, 3865–3868.
- 4 C. Adamo and V. Barone, *J. Chem. Phys.*, 1999, **110**, 6158–6170.
- 5 S. Grimme, J. Antony, S. Ehrlich and H. Krieg, *J. Chem. Phys.*, 2010, **132**, 154104.
- 6 S. Grimme, S. Ehrlich and L. Goerigk, *J. Comput. Chem.*, 2011, **32**, 1456–1465.
- 7 R. Ditchfield, W. J. Hehre and J. A. Pople, *J. Chem. Phys.*, 1971, **54**, 724–728.
- 8 W. J. Hehre, R. Ditchfield and J. A. Pople, *J. Chem. Phys.*, 1972, **56**, 2257–2261.
- 9 M. M. Francl, W. J. Pietro, W. J. Hehre, J. S. Binkley, M. S. Gordon, D. J. DeFrees and J. A. Pople, *J. Chem. Phys.*, 1982, **77**, 3654–3665.
- 10 O. S. Lee and E. Zysman-Colman, Digichem (version 7.0.0-pre.3) Digichem Project, St Andrews, Scotland, 2024.
- 11 W. Humphrey, A. Dalke and K. Schulten, *J. Mol. Graph.*, 1996, **14**, 33–38.
- 12 J. Stone, PhD thesis, Computer Science Department, University of Missouri-Rolla, 1998.
- 13 O. S. Lee, PhD thesis, University of St Andrews, 2024.
- 14 F. Tenopala-Carmona, O. S. Lee, E. Crovini, A. M. Neferu, C. Murawski, Y. Olivier, E. Zysman-Colman and M. C. Gather, *Adv. Mater.*, 2021, **33**, 2100677.
- 15 K. V. Mardia and P. E. Jupp, in *Encyclopedia of Statistical Sciences*, John Wiley & Sons, Inc., Hoboken, NJ, USA, 2006, vol. 25.
- 16 Digichem Convert — Digichem 6.1.0 documentation, <https://doc.digichem.co.uk/reference/digichem-convert.html#supported-file-formats>, (accessed 22 July 2024).
- 17 E. Berquist, A. Dumi, S. Upadhyay, O. D. Abarbanel, M. Cho, S. Gaur, V. H. C. Gil, G. R. Hutchison, O. S. Lee, A. S. Rosen, S. Schamnad, F. S. S. Schneider, C. Steinmann, M. Stolyarchuk, J. E. Vandezande, W. Zak and K. M. Langner, .
- 18 N. M. O’Boyle, M. Banck, C. A. James, C. Morley, T. Vandermeersch and G. R. Hutchison, *J. Cheminformatics*, 2011, **3**, 33.
- 19 N. M. O’Boyle, C. Morley and G. R. Hutchison, *Chem. Cent. J.*, 2008, **2**, 5.
